# Supplementary material
Source: publisher site journal article supplement (https://www.dovepress.com/article/111748)
Supplement: Supplementary file 1 [file get_supplementary_file.php]

## Supplementary materials

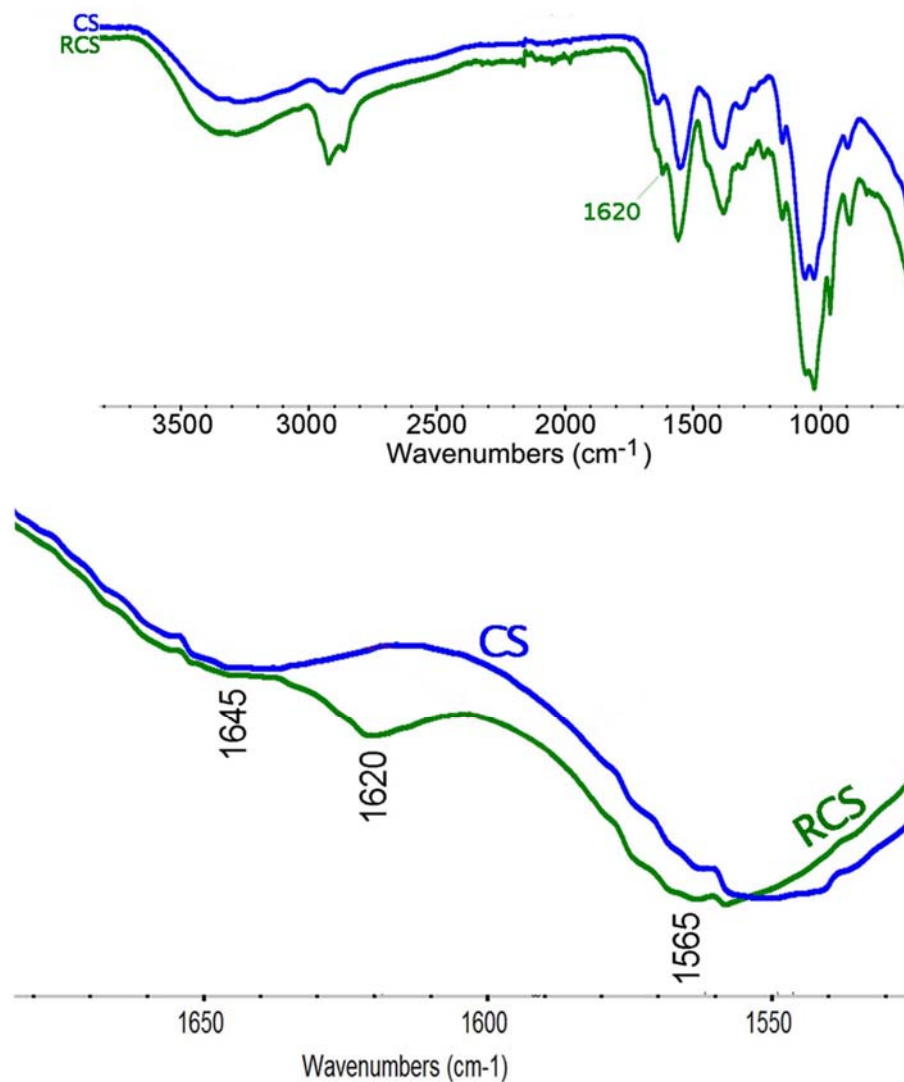

**Figure S1** FTIR spectra of chitosan (CS) and retinilidenechitosan (RCS): the whole spectra (top), and the expansion showing the stretching of imine bond at 1620 cm<sup>-1</sup> in the PRN (bottom).

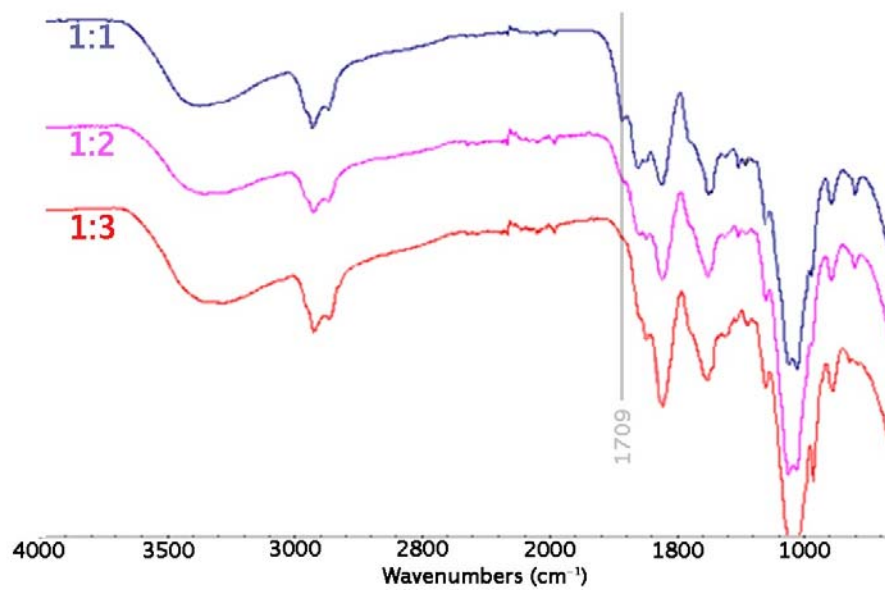

**Figure S2** FTIR spectra of the reaction mixtures obtained from the reactions conducted at the mole ratios between retinal: CS monomeric unit of 1:1, 1:2 and 1:3, showing disappearance of C=O stretching from aldehyde functionality at 1709 cm<sup>-1</sup> in the 1:3 mixture.

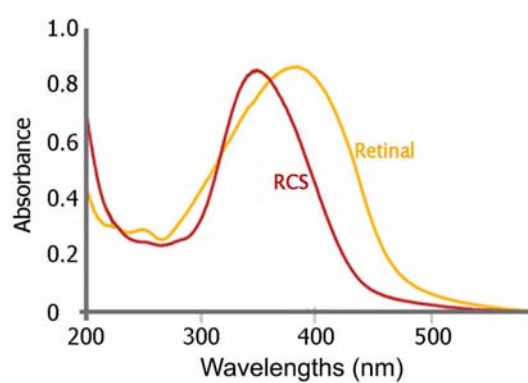

**Figure S3** UV-visible absorption profiles of retinal and retinilidenechitosan (RCS).

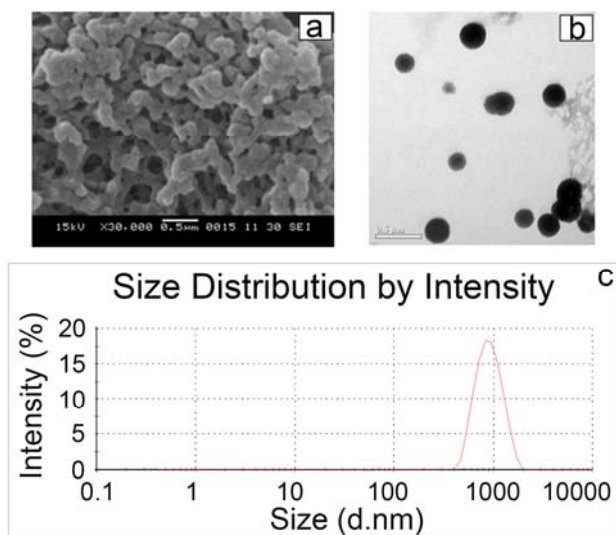

**Figure S4** Scanning electron microscopic or SEM image (a) and transmission electron microscopic or TEM image (b), and size distribution graph from dynamic light scattering analysis (c) of the pro-retinal nanoparticles (PRN).

**Table S1** Characteristics of volunteers in the single patch test.

|                           |     |
|---------------------------|-----|
| Total numbers of subjects | 20  |
| Age (years)               |     |
| 15 – 25                   | 15% |
| 26 – 45                   | 70% |
| 46 – 65                   | 15% |
| Gender                    |     |
| Male                      | 20% |
| Female                    | 80% |

**Table S2** Characteristics of volunteers participating in the anti-aging efficacy test.

|                          |               |
|--------------------------|---------------|
| Number of subjects       | 30            |
| Mean age (S.D.) in years | 42.33 (8.121) |
| Median age (years)       | 41            |
| Min age (years)          | 30            |
| Max age (years)          | 62            |
| Skin type <sup>a</sup>   |               |
| III                      | 33.3%         |
| IV                       | 56.7%         |
| V                        | 10.0%         |

<sup>a</sup>Phototype according to the classification of Fitzpatrick

**Table S3** Tolerance study on rat skin; showing the scale of irritation against various samples (rat groups) at day 14 of the daily application of *Water group*: 200 µL distilled water, *Retinoic acid group*: 3.33 mM (0.1% w/v) retinoic acid solution; *Retinal group*: 3.33 mM retinal solution; *Pro-retinal nanoparticle group*: PRN suspension (at the concentration corresponded to 3.33 mM retinoid).

| Rat groups    | Irritation scales (Numbers of rats) <sup>a</sup> |   |   |   |
|---------------|--------------------------------------------------|---|---|---|
|               | 0                                                | 1 | 2 | 3 |
| Water         | 5                                                | - | - | - |
| Retinoic acid | -                                                | - | - | 5 |
| Retinal       | -                                                | - | 3 | 2 |
| PRN           | 5                                                | - | - | - |

<sup>a</sup> Tolerance was graded on the following 0 to 3 scale:

- 0: no sign
- 1: mild stinging and no objective sign
- 2: stinging burning and visible erythema with subsequent fine scaling
- 3: frank burning and erythema with edema

**Table S4** Skin irritation responses of various test materials in volunteers at various times post the removal of the 24 h close patch of the test samples.

| Test material   | Time (h) | N (%) Grade of skin reaction (n = 20) |          |                 |        |        | Mean $\pm$ SD of severity grade |
|-----------------|----------|---------------------------------------|----------|-----------------|--------|--------|---------------------------------|
|                 |          | Negative                              | Positive | Positive Grades |        |        |                                 |
|                 |          |                                       |          | 0.5+            | 1+     | 2+     |                                 |
| Distilled Water | 1        | 20 (100)                              | -        | -               | -      | -      | -                               |
| 2.5% SDS        | 1        | 9 (45)                                | 11 (55)  | 8 (40)          | 1 (5)  | 2 (10) | 0.82 $\pm$ 0.60                 |
|                 | 24       | 3 (15)                                | 17 (85)  | 8 (40)          | 4 (20) | 5 (25) | 1.06 $\pm$ 0.66                 |
|                 | 48       | 4 (20)                                | 16 (80)  | 8 (40)          | 4 (20) | 4 (20) | 1.00 $\pm$ 0.63                 |
| PRN             | 1        | 19 (95)                               | 1 (5)    | 1 (5)           | -      | -      | 0.50                            |
|                 | 24       | 20 (100)                              | -        | -               | -      | -      | -                               |
|                 | 48       | 20 (100)                              | -        | -               | -      | -      | -                               |

**Table S5** Irritant responses in volunteers (shown as numbers of volunteers) against PRN as compared to distilled water and 2.5% SDS, at 1 h post the opening of the 24 h close patch of the test samples.

| Irritation potential of PRN compared to controls | N (%) Skin reaction (n = 20)       |                         |                     |                                 | p-value <sup>a</sup> |
|--------------------------------------------------|------------------------------------|-------------------------|---------------------|---------------------------------|----------------------|
|                                                  | No irritation with control and PRN | Irritation with control | Irritation with PRN | Irritation with control and PRN |                      |
| Distilled Water (Negative control)               | 19 (95)                            | -                       | 1 (5)               | -                               | >0.005               |
| 2.5% SDS (Positive control)                      | 9 (45)                             | 10 (50)                 | -                   | 1 (5)                           | <0.005               |

<sup>a</sup>McNemar test

**Table S6** Changes (%) in the surface, volume and texture parameters (energy, entropy, homogeneity, contrast and variance) of volunteers at day 84 post the twice-daily application of samples (retinoic acid (RA) as control, at  $\approx 4.17 \mu\text{g retinoid}/\text{cm}^2$  for each application).

| Parameter                 | Expected change if treatment effective | PRN     |               |          |                      | RA      |               |          |                      |
|---------------------------|----------------------------------------|---------|---------------|----------|----------------------|---------|---------------|----------|----------------------|
|                           |                                        | T0      | T0 + 12 weeks | % change | P-value <sup>a</sup> | T0      | T0 + 12 weeks | % change | P-value <sup>a</sup> |
| Surface (%)               | decrease                               | 583.953 | 511.177       | -12.5    | < 0.05               | 568.703 | 528.060       | -7.1     | < 0.05               |
| Volume (mm <sup>3</sup> ) | decrease                               | 89.900  | 81.667        | -9.2     | not significant      | 90.833  | 86.233        | -5.1     | not significant      |
| Energy (pixels)           | increase                               | 0.023   | 0.032         | 42.9     | < 0.05               | 0.022   | 0.031         | 41.9     | < 0.05               |
| Entropy (pixels)          | increase                               | 1.390   | 1.467         | 5.5      | < 0.05               | 1.389   | 1.461         | 5.1      | < 0.05               |
| Homogeneity (pixels)      | increase                               | 1.303   | 1.363         | 4.6      | < 0.05               | 1.305   | 1.342         | 2.9      | < 0.05               |
| Contrast (pixels)         | decrease                               | 2.123   | 1.561         | -26.5    | < 0.05               | 2.095   | 1.673         | -20.2    | < 0.05               |
| Variance (pixels)         | decrease                               | 6.318   | 5.465         | -13.5    | < 0.05               | 6.278   | 5.710         | -9.1     | < 0.05               |

<sup>a</sup>two-tailed paired Student t-test (normality of distributions checked) or the Wilcoxon test (normality of the distributions rejected)
